# Supplementary material
Source: ML conference proceedings conference paper supplement (https://openreview.net/forum?id=Xecc-oeRzMr)
Supplement: supplementary_material [file attachment]

## A IMPLEMENTATION DETAILS

### A.1 DATASETS

We evaluate BRGCL on five public benchmarks that are widely used for node representation learning, namely Cora, Citeseer, PubMed (Sen et al., 2008), Coauthor CS, and ogbn-arxiv (Hu et al., 2020). Cora, Citeseer and PubMed are three most widely used citation networks. Coauthor CS is co-authorship graph. The ogan-arxiv is a directed citation graph. We summarize the statistics of the datasets in Table 3. Among the five benchmarks, ogbn-arxiv is known for its larger scale, and is more challenging to deal with. For all our experiments, we follow the default separation of training, validation, and test sets on each benchmark.

Table 3: The statistics of the datasets.

| Dataset            | Nodes   | Edges     | Features | Classes |
|--------------------|---------|-----------|----------|---------|
| <b>Cora</b>        | 2,708   | 5,429     | 1,433    | 7       |
| <b>CiteSeer</b>    | 3,327   | 4,732     | 3,703    | 6       |
| <b>PubMed</b>      | 19,717  | 44,338    | 500      | 3       |
| <b>Coauthor CS</b> | 18,333  | 81,894    | 6,805    | 15      |
| <b>ogbn-arxiv</b>  | 169,343 | 1,166,243 | 128      | 40      |

### A.2 MORE DETAILS ABOUT NODE CLASSIFICATION

The robust node representations are used to perform node classification and node clustering mentioned in Section 3 of the main paper. More details about node classification are introduced in this subsection. As the connected neighbors in a graph usually show similar semantic information, we generate soft labels of nodes via label propagation on the graph to take the advantage of the information from the neighborhood. The classifier for node classification is trained with soft labels instead of hard labels.

First, we define the one-hot hard label matrix  $\mathbf{Y} \in \mathbb{R}^{N \times K}$ , where  $\mathbf{Y}_{ij} = 1$  if and only if node  $v_i$  is in class  $j$  for  $i \in [N]$  and  $j \in [K]$ . If a node  $v_i \in \mathcal{V}_{\mathcal{L}}$ , then  $\mathbf{Y}_{ij} = 1$  if the ground truth label of  $v_i$  is  $j$ . If  $v_i \notin \mathcal{V}_{\mathcal{L}}$ , we initialize  $\mathbf{Y}_{ij} = 0$  for all  $j \in [K]$ . Then the soft labels of all the nodes are generated by graph label propagation. Similar to (3), after  $T$  aggregation steps of label propagation, we have  $\mathbf{Y}^{(t+1)} = (1 - \beta)\mathbf{A}\mathbf{Y}^{(t)} + \beta\mathbf{Y}^{(0)}$ ,  $t = 1, \dots, T - 1$ , where  $\mathbf{Y}^{(0)} = \mathbf{Y}$ ,  $\beta$  is the teleport probability. The soft labels are then obtained by  $\tilde{\mathbf{Y}} = \text{softmax}(\mathbf{Y}^{(T)})$ . We denote the  $i$ -th row of  $\tilde{\mathbf{Y}}$  by  $\tilde{\mathbf{y}}_i$ , which is the soft label of node  $v_i$ .  $f(\cdot)$  is a classifier built by a two-layer MLP followed by a softmax function, which is trained by minimizing the standard loss function for classification,  $\mathcal{L}_{\text{cls}} = \frac{1}{|\mathcal{V}_{\mathcal{L}}|} \sum_{v_i \in \mathcal{V}_{\mathcal{L}}} H(\tilde{\mathbf{y}}_i, f(\mathbf{h}_i))$ , where  $H$  is the cross-entropy function.

### A.3 TUNING HYPER-PARAMETERS BY CROSS-VALIDATION

In this section, we show the tuning procedures on the hyper-parameters  $\xi$  from Equation (2) and  $\gamma_0$  from Equation (5). We perform cross-validations on 20% of training data to decide the value of  $\xi$  and  $\gamma_0$ . The value of  $\xi$  is selected from  $\{0.1, 0.15, 0.2, 0.25, 0.3, 0.35, 0.4, 0.45, 0.5\}$ . The value of  $\gamma_0$  is selected from  $\{0.1, 0.2, 0.3, 0.4, 0.5, 0.6, 0.7, 0.8, 0.9\}$ . The selected values for  $\xi$  and  $\gamma_0$  on each dataset are shown in Table 4.

Table 4: Selected hyper-parameters for each dataset.

| Dataset    | Cora | Citeseer | PubMed | Coauthor CS | ogbn-arxiv |
|------------|------|----------|--------|-------------|------------|
| $\xi$      | 0.20 | 0.15     | 0.35   | 0.40        | 0.25       |
| $\gamma_0$ | 0.3  | 0.5      | 0.7    | 0.4         | 0.4        |

## B ADDITIONAL EXPERIMENT RESULTS

### B.1 ADDITIONAL NODE CLASSIFICATION RESULTS WITH LABEL NOISE AND ATTRIBUTE NOISE.

The results for node classification with symmetric label noise and asymmetric label noise on Cora, Citeseer, and Coauthor CS are shown in Table 5. In addition, the results for node classification with attribute noise on Cora, Citeseer, and Coauthor CS are shown in Table 6. It is observed that BRGCL outperforms all the baselines for node classification with both label noise and attribute noise on all three benchmark datasets.

Table 5: Performance comparison on node classification with symmetric label noise and asymmetric label noise.

| Dataset     | Methods             | Noise Level        |                                  |                                  |                                  |
|-------------|---------------------|--------------------|----------------------------------|----------------------------------|----------------------------------|
|             |                     | 0                  | 40                               | 60                               | 80                               |
|             |                     | -                  | Asymmetric / Symmetric           | Asymmetric / Symmetric           | Asymmetric / Symmetric           |
| Cora        | GCN *               | 0.817±0.005        | 0.547±0.015 / 0.636±0.007        | 0.405±0.014 / 0.517±0.010        | 0.265±0.012 / 0.354±0.014        |
|             | S <sup>2</sup> GC * | 0.831±0.002        | 0.569±0.007 / 0.664±0.007        | 0.422±0.010 / 0.535±0.010        | 0.279±0.014 / 0.366±0.014        |
|             | GCE                 | 0.819±0.004        | 0.573±0.011 / 0.652±0.008        | 0.449±0.011 / 0.509±0.011        | 0.280±0.013 / 0.353±0.013        |
|             | UnionNET            | 0.820±0.006        | 0.569±0.014 / 0.664±0.007        | 0.452±0.010 / 0.541±0.010        | 0.283±0.014 / 0.370±0.011        |
|             | NRGNN               | 0.822±0.006        | 0.571±0.019 / 0.676±0.007        | 0.470±0.014 / 0.548±0.014        | 0.282±0.022 / 0.373±0.012        |
|             | GraphCL             | 0.815±0.005        | 0.560±0.011 / 0.661±0.009        | 0.450±0.017 / 0.541±0.012        | 0.270±0.018 / 0.368±0.017        |
|             | MVGRL               | 0.829±0.007        | 0.566±0.009 / 0.672±0.009        | 0.455±0.014 / 0.545±0.014        | 0.275±0.014 / 0.379±0.014        |
|             | MERIT               | 0.831±0.006        | 0.560±0.008 / 0.670±0.008        | 0.467±0.013 / 0.547±0.013        | 0.277±0.013 / 0.385±0.013        |
|             | SUGRL               | <b>0.834±0.005</b> | 0.564±0.011 / 0.674±0.012        | 0.468±0.011 / 0.552±0.011        | 0.280±0.012 / 0.381±0.012        |
|             | BRGCL               | 0.822±0.006        | <b>0.584±0.009 / 0.694±0.007</b> | <b>0.484±0.013 / 0.567±0.013</b> | <b>0.295±0.012 / 0.394±0.012</b> |
| Citeseer    | GCN *               | 0.703±0.005        | 0.475±0.023 / 0.501±0.013        | 0.351±0.014 / 0.341±0.014        | 0.291±0.022 / 0.281±0.019        |
|             | S <sup>2</sup> GC * | 0.727±0.005        | 0.488±0.013 / 0.528±0.013        | 0.363±0.012 / 0.367±0.014        | 0.304±0.024 / 0.284±0.019        |
|             | GCE                 | 0.705±0.004        | 0.490±0.016 / 0.512±0.014        | 0.362±0.015 / 0.352±0.010        | 0.309±0.012 / 0.285±0.014        |
|             | UnionNET            | 0.706±0.006        | 0.499±0.015 / 0.547±0.014        | 0.379±0.013 / 0.399±0.013        | 0.322±0.021 / 0.302±0.013        |
|             | NRGNN               | 0.710±0.006        | 0.498±0.015 / 0.546±0.015        | 0.382±0.016 / 0.412±0.016        | 0.336±0.021 / 0.309±0.018        |
|             | GraphCL             | 0.715±0.008        | 0.479±0.017 / 0.534±0.016        | 0.373±0.015 / 0.411±0.014        | 0.331±0.017 / 0.297±0.016        |
|             | MVGRL               | 0.726±0.007        | 0.491±0.013 / 0.541±0.013        | 0.379±0.013 / 0.420±0.013        | 0.341±0.016 / 0.301±0.016        |
|             | MERIT               | <b>0.740±0.007</b> | 0.496±0.012 / 0.536±0.012        | 0.383±0.011 / 0.425±0.011        | 0.344±0.014 / 0.301±0.014        |
|             | SUGRL               | 0.730±0.005        | 0.493±0.011 / 0.541±0.011        | 0.376±0.009 / 0.421±0.009        | 0.339±0.010 / 0.305±0.010        |
|             | BRGCL               | 0.722±0.004        | <b>0.510±0.013 / 0.569±0.013</b> | <b>0.403±0.012 / 0.433±0.014</b> | <b>0.359±0.013 / 0.321±0.014</b> |
| Coauthor CS | GCN *               | 0.918±0.001        | 0.645±0.009 / 0.656±0.006        | 0.511±0.013 / 0.501±0.009        | 0.429±0.022 / 0.389±0.011        |
|             | S <sup>2</sup> GC * | <b>0.928±0.001</b> | 0.657±0.012 / 0.663±0.006        | 0.516±0.013 / 0.514±0.009        | 0.437±0.020 / 0.396±0.010        |
|             | GCE                 | 0.922±0.003        | 0.662±0.017 / 0.659±0.007        | 0.515±0.016 / 0.502±0.007        | 0.443±0.017 / 0.389±0.012        |
|             | UnionNET            | 0.918±0.002        | 0.669±0.023 / 0.671±0.013        | 0.525±0.011 / 0.529±0.011        | 0.458±0.015 / 0.401±0.011        |
|             | NRGNN               | 0.919±0.002        | 0.678±0.014 / 0.689±0.009        | 0.545±0.021 / 0.556±0.011        | 0.461±0.012 / 0.410±0.012        |
|             | SUGRL               | 0.905±0.005        | 0.664±0.018 / 0.679±0.014        | 0.541±0.017 / 0.550±0.015        | 0.441±0.015 / 0.396±0.014        |
|             | MVGRL               | 0.913±0.001        | 0.675±0.008 / 0.685±0.008        | 0.550±0.014 / 0.560±0.014        | 0.453±0.013 / 0.405±0.013        |
|             | MERIT               | 0.924±0.004        | 0.679±0.011 / 0.689±0.008        | 0.552±0.014 / 0.562±0.014        | 0.452±0.013 / 0.403±0.013        |
|             | SUGRL               | 0.922±0.005        | 0.675±0.010 / 0.695±0.010        | 0.550±0.011 / 0.560±0.011        | 0.449±0.011 / 0.411±0.011        |
|             | BRGCL               | 0.920±0.003        | <b>0.690±0.012 / 0.710±0.008</b> | <b>0.566±0.014 / 0.572±0.011</b> | <b>0.461±0.011 / 0.428±0.015</b> |

Table 6: Performance comparison on node classification with attribute noise.

| Dataset     | Methods             | Noise Level        |                    |                    |                    |                    |                    |
|-------------|---------------------|--------------------|--------------------|--------------------|--------------------|--------------------|--------------------|
|             |                     | 0                  | 40                 | 50                 | 60                 | 70                 | 80                 |
| Cora        | GCN *               | 0.817±0.005        | 0.639±0.008        | 0.510±0.006        | 0.439±0.012        | 0.371±0.014        | 0.317±0.013        |
|             | S <sup>2</sup> GC * | 0.831±0.002        | 0.661±0.007        | 0.521±0.008        | 0.454±0.011        | 0.371±0.010        | 0.320±0.013        |
|             | NRGNN               | 0.822±0.006        | 0.654±0.009        | 0.517±0.009        | 0.449±0.014        | 0.385±0.012        | 0.322±0.013        |
|             | SUGRL               | 0.829±0.007        | 0.655±0.011        | 0.522±0.007        | 0.445±0.012        | 0.381±0.011        | 0.330±0.014        |
|             | MVGRL               | 0.831±0.006        | 0.671±0.009        | 0.531±0.008        | 0.450±0.014        | 0.385±0.010        | 0.335±0.009        |
|             | MERIT               | <b>0.834±0.005</b> | 0.675±0.009        | 0.528±0.011        | 0.452±0.012        | 0.388±0.012        | 0.338±0.014        |
|             | BRGCL               | 0.822±0.006        | <b>0.690±0.010</b> | <b>0.540±0.010</b> | <b>0.469±0.013</b> | <b>0.399±0.010</b> | <b>0.356±0.011</b> |
| Citeseer    | GCN *               | 0.703±0.005        | 0.529±0.009        | 0.468±0.012        | 0.372±0.011        | 0.313±0.011        | 0.290±0.014        |
|             | S <sup>2</sup> GC * | 0.727±0.005        | 0.553±0.008        | 0.491±0.011        | 0.390±0.013        | 0.310±0.012        | 0.288±0.011        |
|             | NRGNN               | 0.710±0.006        | 0.540±0.007        | 0.501±0.013        | 0.384±0.014        | 0.317±0.009        | 0.287±0.012        |
|             | SUGRL               | 0.726±0.007        | 0.540±0.008        | 0.501±0.008        | 0.386±0.011        | 0.315±0.005        | 0.282±0.011        |
|             | MVGRL               | <b>0.740±0.007</b> | 0.542±0.010        | 0.505±0.007        | 0.387±0.008        | 0.311±0.007        | 0.295±0.009        |
|             | MERIT               | 0.730±0.005        | 0.544±0.010        | 0.503±0.008        | 0.388±0.009        | 0.314±0.011        | 0.300±0.009        |
|             | BRGCL               | 0.722±0.004        | <b>0.562±0.007</b> | <b>0.514±0.012</b> | <b>0.399±0.012</b> | <b>0.331±0.012</b> | <b>0.312±0.010</b> |
| Coauthor CS | GCN *               | 0.918±0.001        | 0.702±0.010        | 0.628±0.012        | 0.531±0.010        | 0.455±0.011        | 0.415±0.013        |
|             | S <sup>2</sup> GC * | <b>0.928±0.001</b> | 0.713±0.010        | 0.638±0.010        | 0.556±0.009        | 0.476±0.012        | 0.422±0.012        |
|             | NRGNN               | 0.919±0.002        | 0.710±0.012        | 0.632±0.013        | 0.560±0.008        | 0.469±0.011        | 0.423±0.012        |
|             | SUGRL               | 0.913±0.001        | 0.706±0.008        | 0.633±0.008        | 0.561±0.008        | 0.465±0.009        | 0.412±0.008        |
|             | MVGRL               | 0.924±0.004        | 0.709±0.005        | 0.634±0.007        | 0.562±0.011        | 0.466±0.005        | 0.426±0.005        |
|             | MERIT               | 0.922±0.005        | 0.714±0.006        | 0.639±0.009        | 0.561±0.007        | 0.471±0.007        | 0.429±0.008        |
|             | BRGCL               | 0.920±0.003        | <b>0.722±0.009</b> | <b>0.653±0.011</b> | <b>0.575±0.013</b> | <b>0.488±0.010</b> | <b>0.442±0.012</b> |

## B.2 STATISTICAL SIGNIFICANCE OF IMPROVEMENTS FOR NODE CLASSIFICATION WITH LABEL NOISE.

To validate the statistical significance of the improvements of BRGCL over competing methods, we further calculate the  $p$ -values of t-test between BRGCL and the second best baseline for each noise level and dataset for symmetric label noise, asymmetric label noise, and attribute label noise. The  $p$ -values for node classification with label noise are shown in Table 7. The  $p$ -values for node classification with attribute noise are shown in Table 8. We run all the experiments for 10 times with random initialization and injected symmetric and asymmetric label noise. The  $p$ -values for all datasets with all noise levels are less than 0.05, suggesting the statistically significant improvement of BRGCL over baseline methods.

Table 7:  $p$ -values of the t-test between BRGCL and the second best baseline on semi-supervised node classification with symmetric label noise and asymmetric label noise.

| Dataset     | Noise Level            |                        |                        |
|-------------|------------------------|------------------------|------------------------|
|             | 40                     | 60                     | 80                     |
|             | Asymmetric / Symmetric | Asymmetric / Symmetric | Asymmetric / Symmetric |
| Cora        | 0.0285 / 0.0021        | 0.0091 / 0.0038        | 0.0079 / 0.0217        |
| Citeseer    | 0.0133 / 0.0024        | 0.0003 / 0.0013        | 0.0009 / 0.0401        |
| PubMed      | 0.0051 / 0.0354        | 0.0219 / 0.0129        | 0.0279 / 0.0106        |
| Coauthor CS | 0.0341 / 0.0102        | 0.0121 / 0.0267        | 0.0317 / 0.0097        |
| ogbn-arxiv  | 0.0393 / 0.0076        | 0.0039 / 0.0331        | 0.0095 / 0.0292        |

Table 8:  $p$ -values of the t-test between BRGCL and the second best baseline on semi-supervised node classification with attribute noise.

| Dataset     | Noise Level |        |        |        |        |
|-------------|-------------|--------|--------|--------|--------|
|             | 40          | 50     | 60     | 70     | 80     |
| Cora        | 0.0082      | 0.0193 | 0.0110 | 0.0267 | 0.0372 |
| Citeseer    | 0.0019      | 0.0410 | 0.0394 | 0.0106 | 0.0289 |
| PubMed      | 0.0286      | 0.0301 | 0.0371 | 0.0097 | 0.0165 |
| Coauthor CS | 0.0402      | 0.0122 | 0.0398 | 0.0051 | 0.0176 |
| ogbn-arxiv  | 0.0219      | 0.0284 | 0.0314 | 0.0177 | 0.0120 |

## B.3 NODE CLUSTERING WITH INPUT ATTRIBUTE NOISE

To further validate the performance of the node representation learned by BRGCL, we perform node clustering on clean benchmark datasets. We follow the same evaluation protocol as that in Section 5.2. K-means is then applied to the learned node representations to obtain the clustering results. It can be observed from Table 9 that BRGCL still outperforms all baseline methods for node clustering.

Table 9: Node clustering performance comparison on clean benchmark datasets.

| Methods           | Cora             |                  | Citeseer         |                  | PubMed           |                  | Coauthor CS      |                  | ogbn-arxiv       |                  |
|-------------------|------------------|------------------|------------------|------------------|------------------|------------------|------------------|------------------|------------------|------------------|
|                   | ACC              | NMI              |
| Supervised        |                  |                  |                  |                  |                  |                  |                  |                  |                  |                  |
| GCN               | 68.3±0.71        | 52.3±0.54        | 68.8±0.65        | 41.9±0.24        | 69.1±0.99        | 31.2±0.46        | 69.8±0.34        | 68.6±0.59        | 52.0±1.02        | 68.0±0.74        |
| S <sup>2</sup> GC | 69.6±0.42        | 54.7±0.65        | 69.1±0.82        | 42.8±0.55        | 70.1±0.89        | 33.2±0.31        | 70.2±0.45        | 67.0±0.72        | 53.6±0.79        | 68.5±0.70        |
| NRGNN             | 72.1±0.53        | 55.6±0.49        | 69.3±0.77        | 43.6±0.51        | 69.9±1.03        | 34.2±0.59        | 68.8±0.59        | 66.2±0.84        | 51.9±0.84        | 68.1±0.65        |
| Unsupervised      |                  |                  |                  |                  |                  |                  |                  |                  |                  |                  |
| K-means           | 49.2±0.56        | 32.1±0.53        | 54.0±0.43        | 30.5±1.03        | 59.5±0.67        | 31.5±0.77        | 35.2±0.76        | 20.1±0.92        | 31.6±0.75        | 35.9±0.96        |
| GAE               | 59.6±0.67        | 42.9±0.62        | 57.9±0.38        | 17.6±1.01        | 65.2±0.37        | 27.7±0.35        | 46.7±0.88        | 41.6±0.81        | 38.9±0.91        | 48.4±1.02        |
| ARVGA             | 64.0±0.41        | 45.0±0.59        | 57.3±0.51        | 26.1±0.54        | 69.0±0.60        | 29.0±0.44        | 60.3±0.61        | 55.9±0.65        | 49.2±0.80        | 68.3±0.65        |
| GALA              | 74.5±0.57        | 57.6±0.68        | 69.3±0.60        | 44.1±0.39        | 69.3±0.58        | 32.7±0.42        | 66.5±0.79        | 68.8±0.48        | 53.5±0.65        | 66.5±0.72        |
| GraphCL           | 71.9±0.66        | 54.6±0.59        | 68.3±0.42        | 42.7±0.63        | 67.6±0.42        | 31.5±0.32        | 65.2±0.53        | 66.4±0.69        | 52.1±0.67        | 67.6±0.63        |
| MVGRL             | 74.2±0.54        | 57.3±0.44        | 69.6±0.31        | 44.7±0.56        | 69.6±0.44        | 33.9±0.46        | 69.3±0.61        | 69.2±0.57        | 53.2±0.61        | 68.2±0.50        |
| MERIT             | 74.1±0.67        | 57.6±0.55        | 69.7±0.55        | 45.1±0.41        | 69.8±0.30        | 33.7±0.40        | 69.8±0.60        | 69.5±0.59        | 54.3±0.54        | 68.5±0.75        |
| BRGCL             | <b>74.8±0.39</b> | <b>58.1±0.51</b> | <b>70.3±0.39</b> | <b>45.7±0.63</b> | <b>70.4±0.39</b> | <b>34.9±0.45</b> | <b>71.4±0.43</b> | <b>70.2±0.56</b> | <b>55.5±0.52</b> | <b>70.2±0.71</b> |
| $p$ -value        | 0.0009           | 0.0254           | 0.0439           | 0.0395           | 0.0429           | 0.0189           | 0.0099           | 0.0302           | 0.0189           | 0.0151           |

## B.4 COMPARISONS TO EXISTING SAMPLE SELECTION METHODS

In this subsection, we compare BRGCL against previous sample selection methods, including Co-teaching (Han et al., 2018) and Self-Training (Li et al., 2018) for node classification with symmetric

label noise. Co-teaching maintains two networks to select clean samples for each other. Self-Training finds nodes with the most confident pseudo labels, and it augmented the labeled training data by incorporating confident nodes with their pseudo labels into the existing training data. The results are shown in Table 10. We can clearly see that BRGCL greatly outperforms competing sample selection methods.

Table 10: Performance comparison against Co-teaching (Han et al., 2018) and Self-training (Li et al., 2018) on node classification with different levels of symmetric label noise.

| Dataset     | Methods       | Noise Level        |                    |                    |                    |                    |
|-------------|---------------|--------------------|--------------------|--------------------|--------------------|--------------------|
|             |               | 40                 | 50                 | 60                 | 70                 | 80                 |
| Cora        | Self-training | 0.664±0.012        | 0.584±0.007        | 0.532±0.013        | 0.459±0.011        | 0.368±0.012        |
|             | Co-teaching   | 0.668±0.011        | 0.593±0.011        | 0.527±0.010        | 0.465±0.010        | 0.367±0.017        |
|             | BRGCL         | <b>0.694±0.007</b> | <b>0.622±0.009</b> | <b>0.567±0.013</b> | <b>0.500±0.014</b> | <b>0.394±0.012</b> |
| Citeseer    | Self-training | 0.541±0.014        | 0.465±0.013        | 0.397±0.013        | 0.347±0.016        | 0.301±0.022        |
|             | Co-teaching   | 0.522±0.018        | 0.461±0.011        | 0.383±0.011        | 0.338±0.014        | 0.299±0.020        |
|             | BRGCL         | <b>0.569±0.013</b> | <b>0.496±0.011</b> | <b>0.433±0.014</b> | <b>0.368±0.013</b> | <b>0.321±0.014</b> |
| PubMed      | Self-training | 0.597±0.019        | 0.507±0.011        | 0.419±0.021        | 0.380±0.020        | 0.345±0.023        |
|             | Co-teaching   | 0.584±0.013        | 0.499±0.015        | 0.403±0.014        | 0.371±0.011        | 0.342±0.022        |
|             | BRGCL         | <b>0.632±0.010</b> | <b>0.530±0.010</b> | <b>0.468±0.010</b> | <b>0.399±0.012</b> | <b>0.349±0.013</b> |
| Coauthor CS | Self-training | 0.672±0.010        | 0.614±0.012        | 0.542±0.013        | 0.462±0.015        | 0.397±0.015        |
|             | Co-teaching   | 0.666±0.012        | 0.610±0.011        | 0.529±0.015        | 0.451±0.013        | 0.404±0.019        |
|             | BRGCL         | <b>0.710±0.008</b> | <b>0.638±0.009</b> | <b>0.572±0.011</b> | <b>0.480±0.011</b> | <b>0.428±0.015</b> |
| ogbn-arxiv  | Self-training | 0.462±0.012        | 0.413±0.014        | 0.368±0.018        | 0.328±0.014        | 0.276±0.020        |
|             | Co-teaching   | 0.437±0.024        | 0.406±0.011        | 0.359±0.016        | 0.322±0.012        | 0.282±0.025        |
|             | BRGCL         | <b>0.482±0.006</b> | <b>0.432±0.009</b> | <b>0.399±0.009</b> | <b>0.344±0.012</b> | <b>0.296±0.013</b> |

### B.5 JOINT TRAINING VS. DECOUPLED TRAINING.

We study the effectiveness of our decoupled training framework compared with jointly training the encoder and the classifier. We compare the performance on node classification with 20% label noise level. The results are shown in Table 11. It can be observed that decoupling the training of classifier and encoder can mitigate the effects of label noise.

Table 11: Ablation study on contrastive components for node classification with label noise.

| Method    | Cora      |           | Citeseer  |           | PubMed    |           |
|-----------|-----------|-----------|-----------|-----------|-----------|-----------|
|           | Confident | K-means   | Confident | K-means   | Confident | K-means   |
| Joint     | 77.7±0.08 | 78.2±0.11 | 65.7±0.09 | 65.3±0.10 | 72.5±0.10 | 72.5±0.12 |
| Decoupled | 79.3±0.09 | 78.5±0.09 | 66.8±0.07 | 66.3±0.08 | 73.4±0.07 | 73.0±0.09 |

### B.6 NUMBER OF CONFIDENT PROTOTYPES.

To further study the behavior of BRGCL, we show the number of robust prototypes estimated by BPL in Table 12. It can be observed from the results that the estimated number of robust prototypes is usually very close to the ground truth number of classes for different datasets, justifying the effectiveness of BPL. Because BEC is based on the pseudo labels estimated by BPL, the success of BPL leads to trustworthy estimation of confident nodes and robust prototypes by BEC.

Table 12: Number of robust prototypes inferred by BPL compared with the ground truth number of classes on different datasets

| Datasets         | Citeseer | Cora | PubMed | Coauthor CS | ogbn-arxiv |
|------------------|----------|------|--------|-------------|------------|
| $\xi$ in eq. (2) | 0.15     | 0.20 | 0.35   | 0.30        | 0.4        |
| Estimated $K$    | 6        | 8    | 3      | 19          | 48         |
| Classes          | 6        | 7    | 3      | 15          | 40         |
